# Supplementary material for: Cellulosic micelles as nanocapsules of liposoluble CdSe/ZnS quantum dots for bioimaging
Source: Royal Society of Chemistry journal article supplement (doi:10.1039/c6tb01534d), 2016-01-01
Supplement: c6tb01534d1.pdf [file c6tb01534d1.pdf]

## Supplemental Materials

# Cellulosic Micelles as Nanocapsules of Liposoluble CdSe/ZnS Quantum Dots for Bioimaging

*Yanpeng Li<sup>a,‡</sup>, Jinming Zhang<sup>b,‡</sup>, Yanzhu Guo<sup>a,c</sup>, Meiwan Chen<sup>b,\*</sup>, Lu Wang<sup>b</sup>, Runcang Sun<sup>a</sup>,*

*Xiaohui Wang<sup>a,\*</sup>*

<sup>a</sup>State Key Laboratory of Pulp and Paper Engineering, South China University of  
Technology, Guangzhou, 510640, China

<sup>b</sup>State Key Laboratory of Quality Research in Chinese Medicine, Institute of Chinese Medical  
Sciences, University of Macau, Macau, 999078, China

<sup>c</sup>Liaoning Key Laboratory of Pulp and Paper Engineering, Dalian Polytechnic University,  
Dalian, 116034, China

<sup>‡</sup>Equal contributors

<sup>\*</sup>Corresponding authors, Tel./Fax: +86 20 87111861.

E-mail address: [mwchen@umac.mo](mailto:mwchen@umac.mo) (M. Chen); [fewangxh@scut.edu.cn](mailto:fewangxh@scut.edu.cn) (X. Wang).

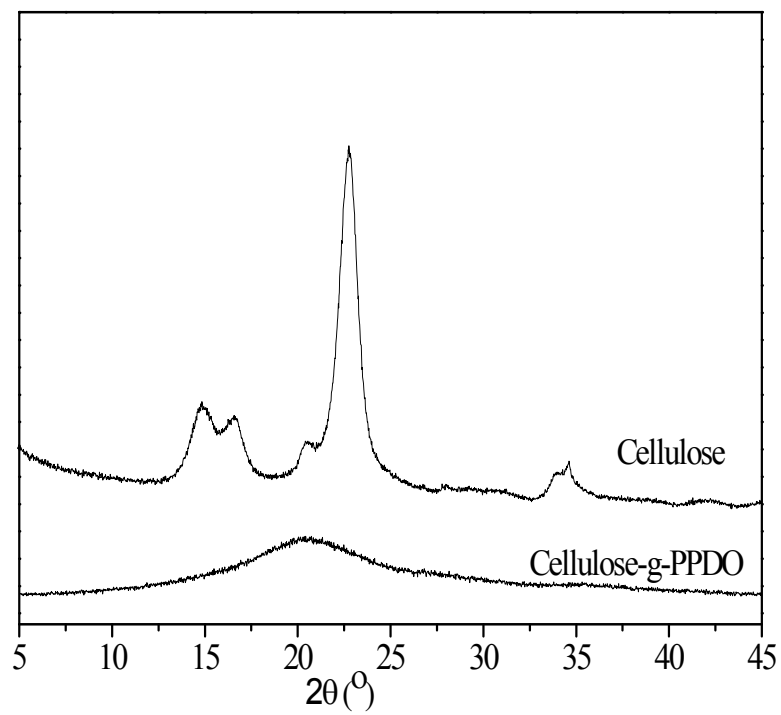

Figure S1. The WXR D patterns of cellulose and cellulose-g-PDO copolymers

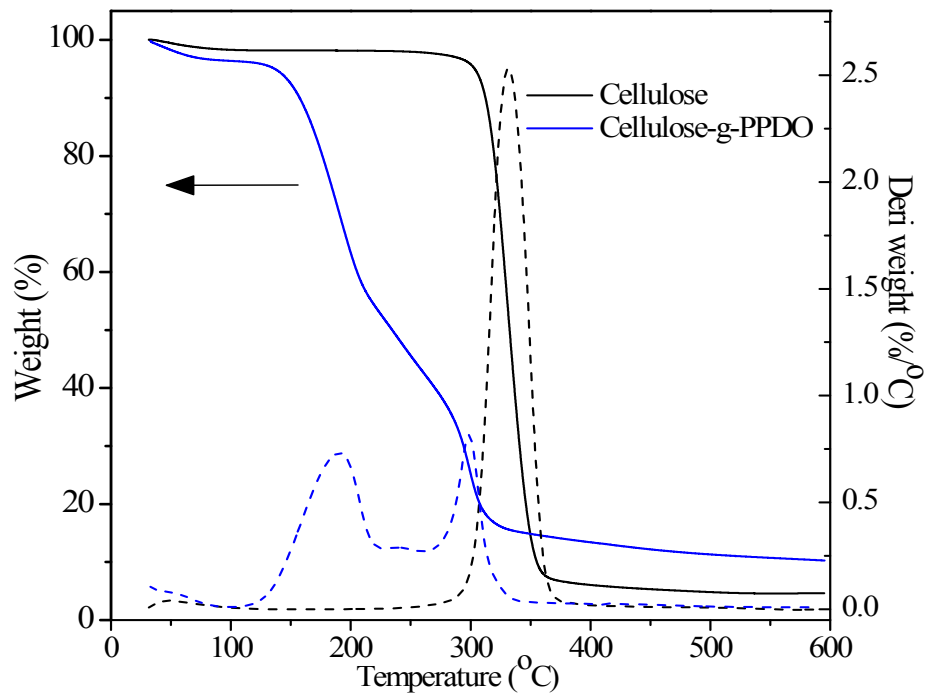

Figure S2. TG and DTG curves of cellulose and cellulose-g-PPDO copolymers

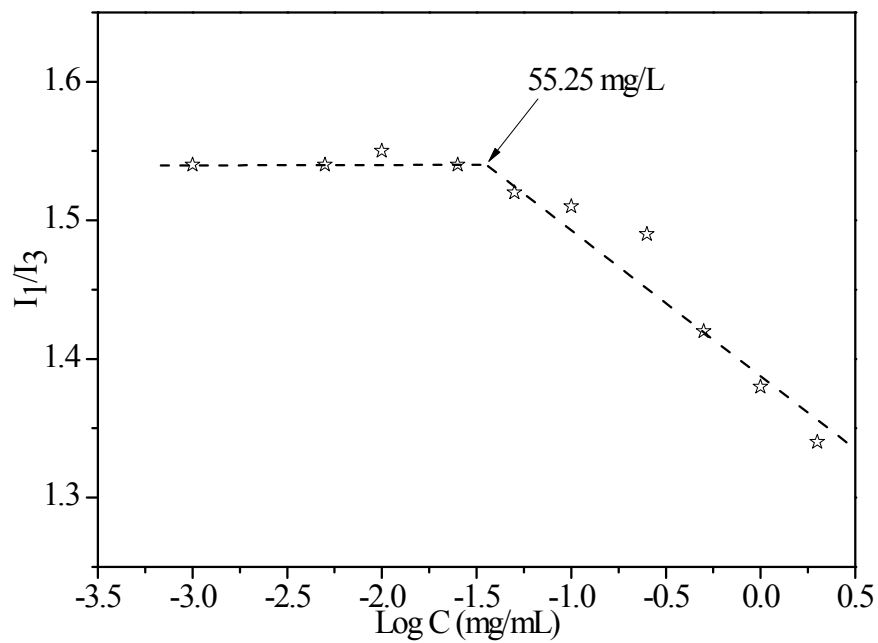

Figure S3. The concentration dependence of I<sub>1</sub>/I<sub>3</sub> of cellulose-g-PPDO copolymer

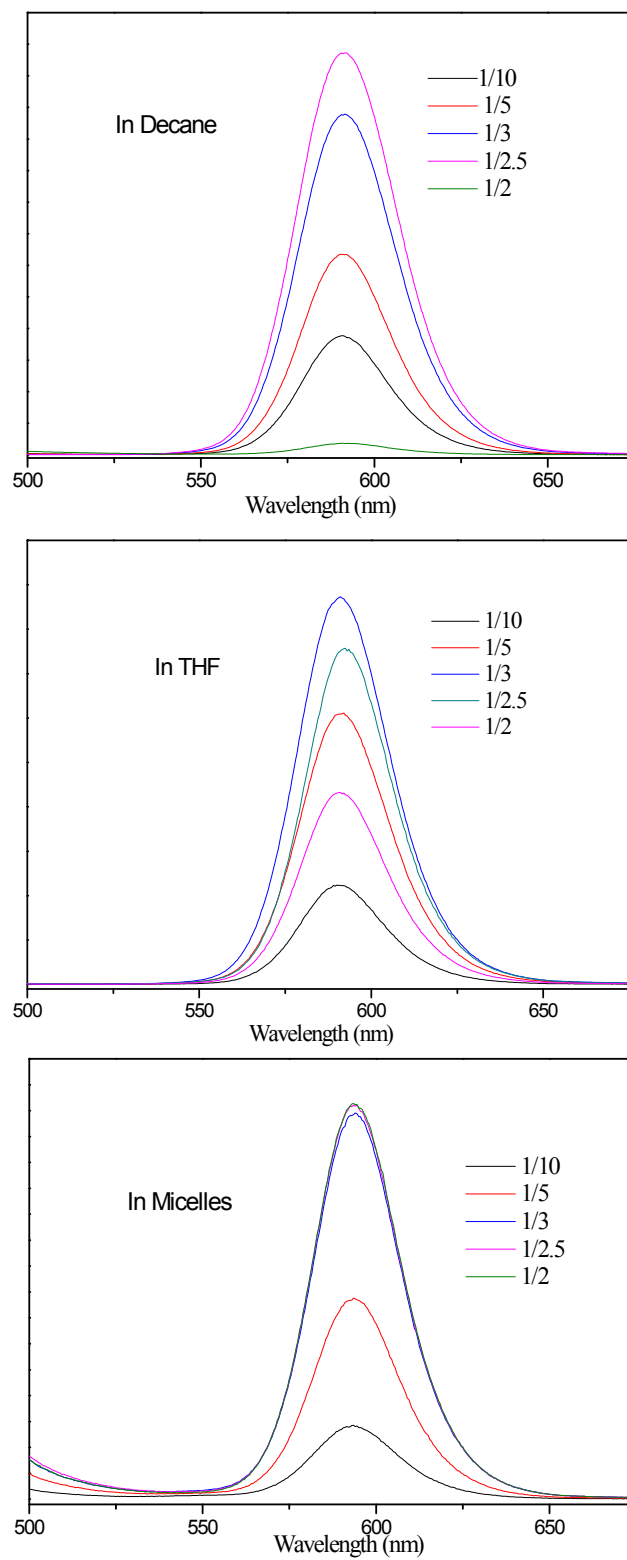

Figure S4. The emission spectra of QDs in cellulose-g-PPDO micelles, decane and THF solution with the same mixing ratios

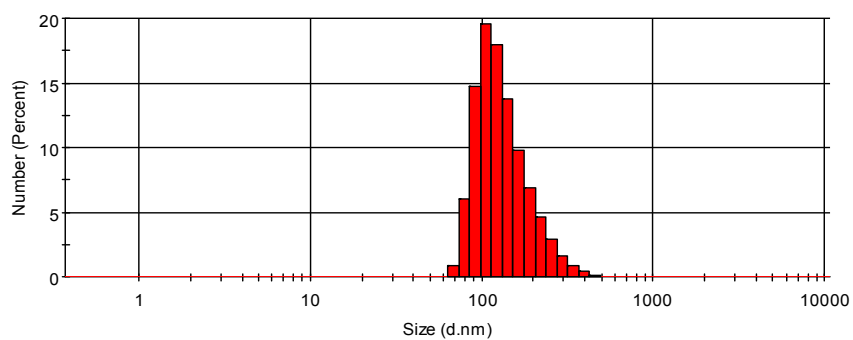

Figure. S5 The size distribution of QDs-encapsulated cellulose-g-PPDO micelles after placed more than 1.5 months

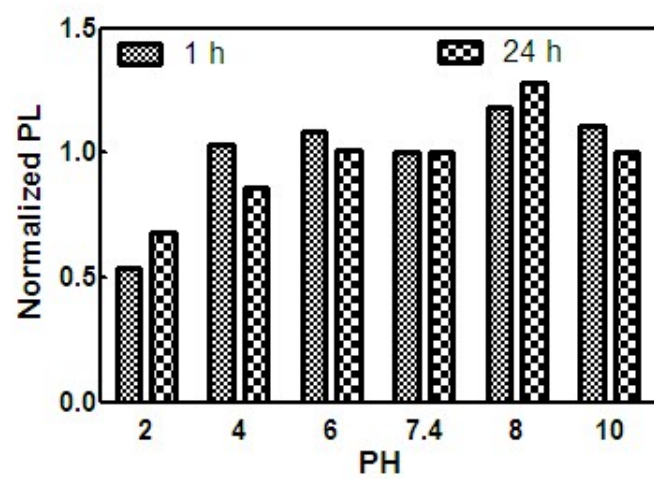

Figure. S6 The pH stability with of the QDs-encapsulated cellulose-g-PPDO micelles after 1h and 24 h conservation
